# Supplementary material
Source: PubMed Central journal article supplement (PMC2224170)

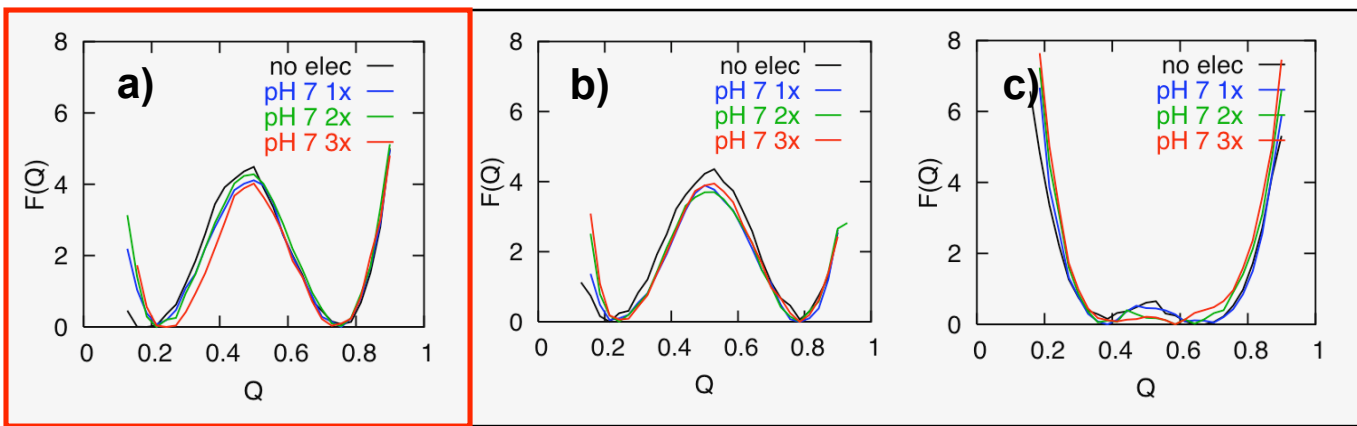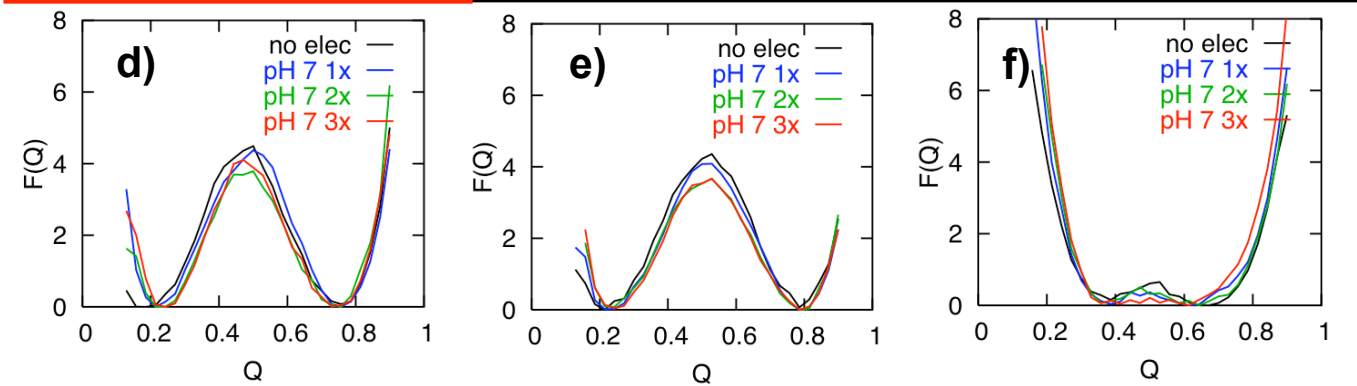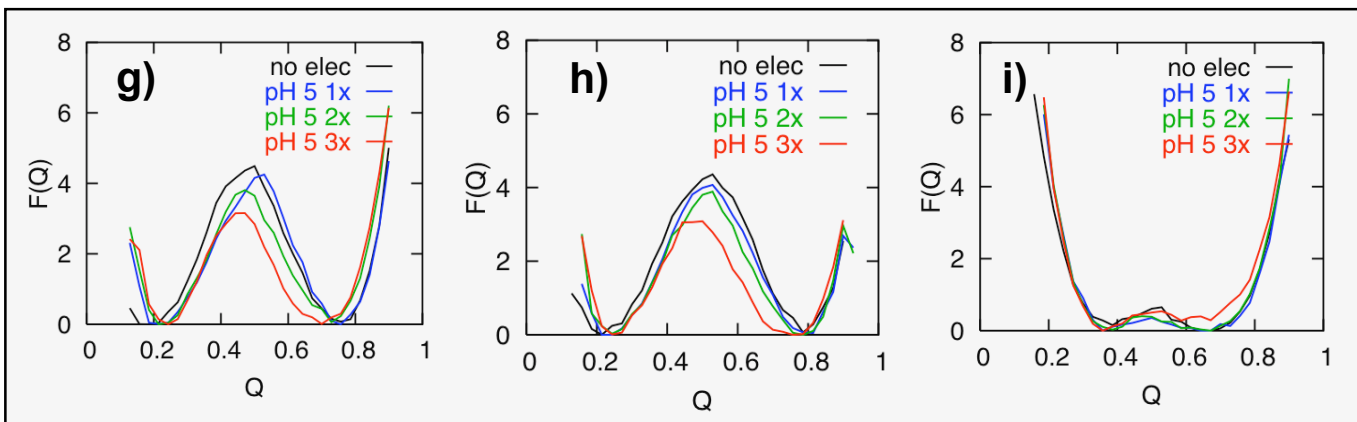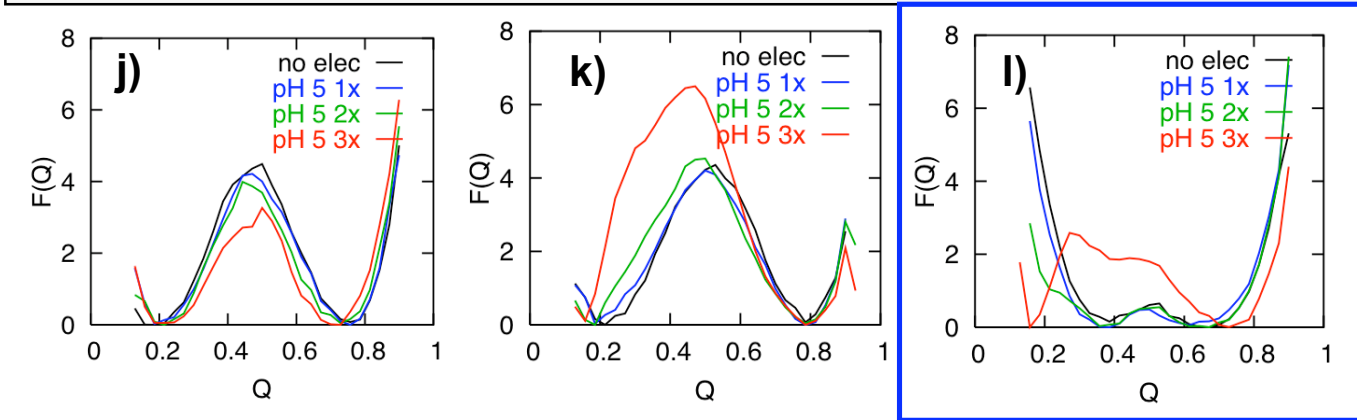

Supplement: pnas_0709376104_1.pdf [file pnas_0709376104_1.pdf]

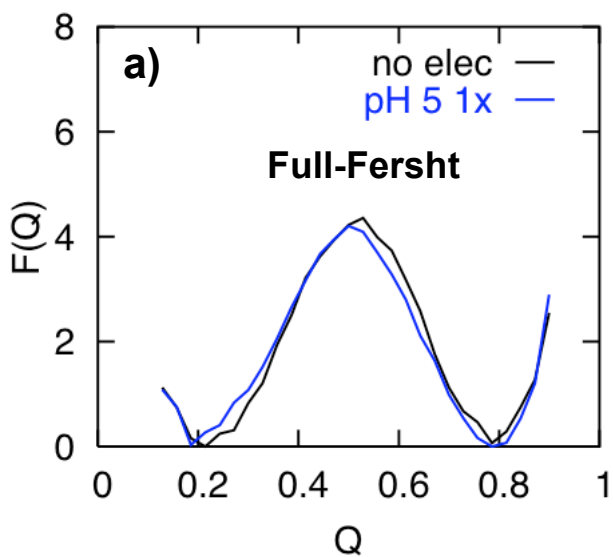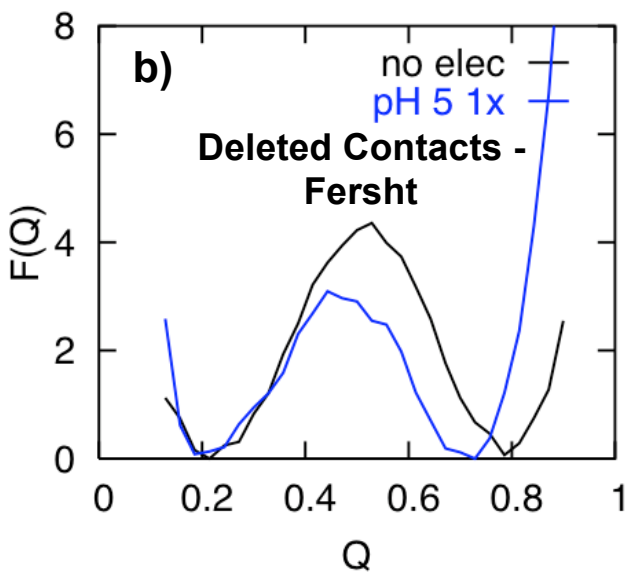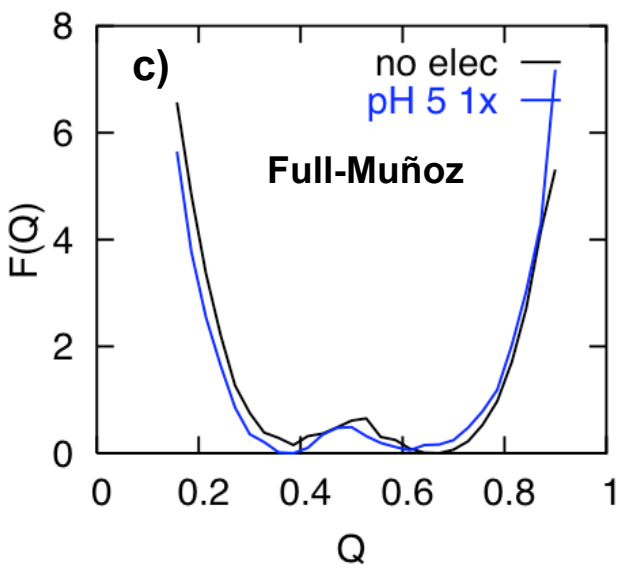

Supplement: pnas_0709376104_2.pdf [file pnas_0709376104_2.pdf]
